# Supplementary material
Source: Research Square preprint supplement (doi:10.21203/rs.3.rs-9759400/v1)
Supplement: Supplementary file 1 [file 1a5a84da11d8d431e03d8f38.docx]

**Multimodal magnetic resonance imaging of brain asymmetries in Alzheimer’s disease: a systematic review**

Yilamujiang Abuduaini, Wenjuan Chen, Rob Saunders, Zonglei Zhen, Xiang-Zhen Kong

**Supplementary Material**

**Table S1** Included research about brain asymmetries in Alzheimer’s disease.

**Table S2** PRISMA checklist.

**Table S3** Risk of bias assessment of included studies.
