# Supplementary material
Source: Research Square preprint supplement (doi:10.21203/rs.3.rs-9759400/v1)
Supplement: Supplementary file 2 [file 690e8d058cf543609bfbeb1a.xlsx]

## Sheet: Sheet1
Table S1: Included research about brain asymmetries in Alzheimer’s disease
article	authors	publication year	Participant Information															Methods						Relevant findings
			Data source	Total participants	Health			SCD			MCI			AD			Diagnostic criteria	MRI	measure	asymmetry type	AI formula	Volume Correction methods	Regions of interest
					N	age	MMSE	N	age	MMSE	N	age	MMSE	N	age	MMSE
Volumes of Medial Temporal Lobe Structures in Patients with Alzheimer’s Disease and Mild Cognitive Impairment (and in Healthy Controls)	Krasuski et al	1998	recruitment	21 HC 13 AD	21	69.3 ± 6.8	29.7 ± 0.2							13	71.2 ± 8.3	23.7 ± 2.7	NINCDS-ADRDA	0.5T, 1.5T	manual	volume	((R - L) / ((R + L) / 2)) * 100	TIV	Hippocampus, amygdala, and anterior and posterior parahippocampal gyrus	Stronger rightward asymmetry was found in the amygdala in AD than HC, no other notable differences were found in other regions
Cortical Variability and Asymmetry in Normal Aging and Alzheimer’s Disease	Thompson et al	1998	recruitment	10 HC 10 AD	10	72.9 ± 5.6	28.8 ± 1.0							10	71.9 ± 10.7	19.7 ± 5.7	NINCDS-ADRDA	1.5T	manual	surface area position & shape	NA		major deep sulcal fissures	Stronger positional and shape asymmetries in the sylvian fissure was found in AD group compared to HC, but there was no difference in the surface area asymmetry
Hippocampal volume discriminates between normal cognition; questionable and mild dementia in the elderly	Wolf et al	2001	Leipzig Longitudinal Study of the Aged - MCI	17 HC 10 MCI/AD	17	78.5 ± 3.1	28.3 ± 1.3							10	78.2 ± 3.0	22.4 ± 2.0	ICD-10	1.5T	manual	volume	100*(R- L) / R non - directional asymmetry: NA	TIV	hippocampus	The magnitude of non-directional hippocampal volume asymmetry was higher in AD/MCI group
The MRI pattern of frontal and temporal brain atrophy in fronto-temporal dementia	Boccardi et al	2003	recruitment	27 HC 27 AD 10 FTD	27	70 ± 8	29 ± 1							27	73 ± 9	20 ± 4	NINCDS-ADRDA	1.5T	manual	volume	R / L	absolute	Frontal and temporal regions, hippocampus	The temporal horn showed larger leftward atrophy asymmetry in FTD than AD, while no significant difference between AD and HC
A Volumetric Magnetic Resonance Imaging Study of the Amygdala in Frontotemporal Lobar Degeneration and Alzheimer’s Disease	Whitwell et al	2005	recruitment	17 HC 20 AD 46 FTLD	17	63.6 ± 10.5	28.9 ± 1.3							20	63.8 ± 9.1	20.3 ± 5.1	NINCDS-ADRDA	1.5T	manual	volume	[2(L-R)] / (L+R)	TIV	amygdala	Stronger rightward volume asymmetry showed in FTLD (especially in SD subgroup) group than AD and HC groups; No significant volume asymmetry differences between AD and HC
Direct Mapping of Hippocampal Surfaces with Intrinsic Shape Context	Shi et al	2007	recruitment	14 HC 12 AD	14	71.4 ± 0.9								12	68.4 ± 1.9		NINCDS-ADRDA		manual automatic	shape			hippocampus	Two methods both found the temporal changes of hippocampal shape asymmetry increases over time in AD group, but decreases over time in HC group
Age Effects on Hippocampal Structural Changes in Old Men: The HAAS	Xu et al	2008	Honolulu-Asia Aging Study cohort	104 HC 24 AD 14 VaD	104	83.2 ± 4.42								24	82.5 ± 4.58		DSM-IIIR NINCDS-ADRDA	1.5T	manual	volume	(L-R) / (L+R)	absolute	hippocampus	There were no significant differences in volume asymmetry among each groups
Hippocampal Volume and Asymmetry in Mild Cognitive Impairment and Alzheimer’s Disease: Meta-Analyses of MRI Studies	Shi et al	2009	29 studies	915 HC 365 MCI 700 AD	915	71.12	28.75				365	71.9	25.94	700	71.86	21.92		1.5 - 4T		volume		ICV / TIV / absoulute	hippocampus	There were no significant between-group differences in volume asymmetry among HC, MCI and AD groups
Structural MRI Biomarkers for Preclinical and Mild Alzheimer’s Disease	Fennema-Notestine et al	2009	ADNI	139 HC 79 single-MCI 96 multiple-domain MCI 84 AD	139	75.6 ± 5.0	29.1 ± 1.0				79 96	75.3 ± 7.7 74.2 ± 7.2	27.6 ± 1.7 26.6 ± 1.7	84	75.0 ± 7.6	23.5 ± 2.1	MMSE NINCDS-ADRDA		automatic	volume thickness	L / R		global brain	There was a rightward asymmetry in the lateral inferior temporal gyrus with increasing degeneration No other asymmetry patterns interact with diagnostic group
Mild cognitive disorders are associated with different patterns of brain asymmetry than normal aging: the PATH through life study	Cherbuin et al	2010	PATH through life study	361 HC 22 MCI	361	66.58 ± 1.44	29.39 ± 1.03				22	66.18 ± 1.56	27.05 ± 2.65				cognitive tests DSM-IV	1.5T	semi-automatic	volume	[(L-R) / (L+R)]*100	absolute	hippocampus, amygdala, thalamus, caudate, putamen, pallidum, ventricles, cerebellum, and total gray and white matter	There were significant volume asymmetry differences in the cerebellum cortex and lateral ventricle between MCI and HC groups, but not differ in other ROIs
Automatic morphometry in Alzheimer's disease and mild cognitive impairment	Heckemann et al	2011	ADNI	211 HC 218 sMCI 163 pMCI 185 AD	211						218 163			185				1.5T	automatic	volume	2|R-L| / (R+L)	absolute	global brain	Significant volume asymmetry differences were displayed in the hippocampus, thalamus, posterior temporal lobe, parietal lobe, superior parietal gyrus and middle inferior temporal gyrus between the AD and HC groups Significant volume asymmetry differences were displayed in the hippocampus,posterior temporal lobe, superior parietal gyrus and middle inferior temporal gyrus between the sMCI and pMCI …
Grey-Matter Atrophy in Alzheimer’s Disease is Asymmetric but not Lateralized	Derflinger et al	2011	recruitment	30 HC 24 amnestic MCI 35 AD	30	67 ± 8.7					24	69 ± 9.0	26.8 ± 1.7	35	71.1 ± 8.7	21.1 ± 4.6	CERAD test battery NINCDS-ADRDA	3.0T		volume		TIV	cerebral cortex	Significant non-directional asymmetry differences were found in the temporal, parietal, occipital lobes and global hemisphere between HC and AD
Cortical asymmetries in normal, mild cognitive impairment, and Alzheimer’s disease	Kim et al	2012	recruitment	152 HC 101 amnestic MCI 207 AD	152	65.3 ± 8.8	28.8 ± 1.4				101	71.0 ± 6.8	26.5 ± 2.4	67 140	75.0 ± 7.8 72.0 ± 8.8	22.5 ± 3.4 17.1 ± 5.3	Peterson criteria NINCDS-ADRDA	1.5T	automatic	thickness	[(L-R) / (L+R)] * 100		cerebral cortex	The cortical thickness asymmetry of the angular gyrus and parahippocampal gyrus was decreased in moderate-to-severe AD compared with NC, others showed no difference The cortical asymmetry patterns observed in HC were maintained in aMCI and AD, but they showed a trend of decreasing as cognitive impairment increased
Hippocampal subfield volumetry in mild cognitive impairment, Alzheimer's disease and semantic dementia	La Joie et al	2013	IMAP	40 HC 17 amnestic MCI 18 AD 8 SD	40	66	30				17	72	27	18	66	20.5	Peterson criteria NINCDS-ADRDA	3.0T	manual	volume	[100 * |(R-L)|] / (L+R)	absolute	hippocampal subfield	Volume asymmetry showed significant difference in the whole hippocampus between the AD and HC groups, but not differ in hippocampus subfields
Whole-brain analysis reveals increased neuroanatomical asymmetries in dementia for hippocampus and amygdala	Wachinger et al	2016	ADNI	210 HC 133 sMCI 212 pMCI 142 AD	210						133 212			142					automatic	volume shape		absolute	cerebral white matter and subcortical structures	Volume asymmetry was significant differ in several structures between AD and HC groups, but almost no structure significantly differ between adjacent diagnostic groups Shape asymmetries of almost all structures are significantly different between AD and HC groups, , except for ventricle and thalamus details see original article
The Abnormality of Topological Asymmetry between Hemispheric Brain White Matter Networks in Alzheimer’s Disease and Mild Cognitive Impairment	Yang et al	2017	ADNI	48 HC 95 MCI 25 AD	48	75 ± 6	29.19 ± 1.14				95	74.9 ± 7.4	27.23 ± 1.59	25	77.4 ± 8.4	22.6 ± 2.02	MMSE & CDR	3.0T	automatic	structural connectivity	(R -L) / (R+L)		global brain	AD group exhibited significantly increased rightward asymmetry in global network efficiency than HC group; The degree of the rightward asymmetry in nodal efficiency was increased primarily around the temporal lobe in patients with AD compared with HC subjects; The aberrations of hemispheric network topological asymmetry of AD and MCI patients were correlated with the memory performance
A Longitudinal Imaging Genetics Study of Neuroanatomical Asymmetry in Alzheimer’s Disease	Wachinger et al	2018	ADNI	434 HC 367 sMCI 269 pMCI 171 AD	434						367 269			171					automatic	shape			hippocampus, amygdala, putamen, and caudate	Shape asymmetries in the hippocampus, amygdala, putamen were increased with the progression of AD
Asymmetry of Hippocampus and Amygdala Defect in Subjective Cognitive Decline Among the Community Dwelling Chinese	Yue et al	2018	Chinese Longitudinal Aging Study	67 HC 111 SCD 30 MCI	67	67.7 ± 6.6	28.1 ± 1.7	111	69.8 ± 7.6	27.3 ± 2.3	30	75.5 ± 7.6	20.2 ± 4.4				Peterson criteria	3.0T	automatic	volume	[(R-L) / (R+L)] * 100%	TIV	hippocampus, amygdala, temporal horn	There were stronger rightward volume asymmetry in the hippocampus and weaker leftward volume asymmetry in the amygdala in HC than MCI, no difference in SCD
Changes in Brain lateralization in Patients with Mild cognitive impairment and alzheimer’s Disease: a resting-state Functional Magnetic resonance study from alzheimer’s Disease neuroimaging initiative	Liu et al	2018	ADNI	19 HC 25 MCI 17 AD	19	74.48 ± 6.56	28.84 ± 1.01				25	74.25 ± 7.38	27.96 ± 2.01	17	74.08 ± 8.09	20.76 ± 3.53		3.0T	automatic	functional connectivity	[(LL-RL)-(RR-LR)]/ (|LL|+|RL|+|RR|+|LR|)		global brain	Functional connectivity asymmetry pattern in HC was lost in the patients with AD
Morphological Biomarker Differentiating MCI Converters from Nonconverters: Longitudinal Evidence Based on Hemispheric Asymmetry	Long et al	2018	ADNI	26 MCI-converters 27 MCI-nonconverters							26 27	73.35 ± 6.71 73.01 ± 7.47	27.19 ± 2.05 28.07 ± 1.33						automatic	shape			cerebral cortex	Significant between-group differences were found in shape asymmetry of the entorhinal cortex, frontal pole, and rostral anterior cingulate
MRI Asymmetry Index of Hippocampal Subfields Increases Through the Continuum From the Mild Cognitive Impairment to the Alzheimer’s Disease	Sarica et al	2018	ADNI	100 HC 100 sMCI 100 pMCI 100 AD	100	73.36 ± 5.76	29.09 ± 1.11				100 100	72.27 ± 7.71 72.47 ± 6.89	28.05 ± 1.72 27.34 ± 1.86	100	74.14 ± 7.72	23.13 ± 2.10		3.0T	automatic	volume	[|(L-R)| / (L+R)] * 100	absolute	hippocampal subfields	AD group showed stronger non-directional volume asymmetry in several hippocampal subfields and the whole hippocampus details see original article
Default Mode Network Lateralization and Memory in Healthy Aging and Alzheimer’s Disease	Banks et al	2018	ADNI	32 Aβ-NC 20 Aβ+NC 44 Aβ+MCI 27 Aβ+AD	32 20	72.72 ± 5.76 74.91 ± 6.92					44	73.21 ± 7.00		27	74.17 ± 6.73		NINCDS-ADRDA	3.0T		functional connectivity			Default Mode Network	Aβ-HC group showed stronger functional leftward asymmetry in the posterior default mode network than MCI and AD groups; No functional asymmetries differed among the Aβ+groups
Association of Asymmetrical White Matter Hyperintensities and Apolipoprotein E4 on Cognitive Impairment	Low & Ng et al	2019	recruitment	90 HC 132 MCI 118 AD	90	61.30 ± 7.11	28.86 ± 1.35				132	65.26 ± 8.73	26.68 ± 2.33	118	66.08 ± 9.53	19.54 ± 5.81	NIA-AA	3.0T	automatic	WMH volume	(L/TIV)*100% - (R/TIV)*100%	TIV	white matter hyperintensity of cerebral cortex	WMH volume asymmetries were in opposite directions in the occipital lobe (significant difference) between MCI and AD. No other significant asymmetry differences were found in other lobes
Asymmetrical atrophy of thalamic subnuclei in Alzheimer’s disease and amyloid-positive mild cognitive impairment is associated with key clinical features	Low & Mak et al	2019	Neuroinflammation in Memory and Related Other Disorders study	33 HC 14 MCI 18 AD	33	69.0 ± 7.0	28.9 ± 1.0				14	74.6 ± 6.3	25.9 ± 1.3	18	72.3 ± 8.6	24.3 ± 4.1	NIA-AA	3.0T	automatic	volume	[(L-R) / 0.5*(L+R)] * 100%	absolute	thalamic subnuclei	The volume asymmetry in the ventral thalamus was stronger in AD (rightward) than MCI (leftward) and HC groups
Sexual Dimorphism and Hemispheric Asymmetry of Hippocampal Volumetric Integrity in Normal Aging and Alzheimer Disease	Ardekani et al	2019	Open Access Series of Imaging Studies - phase 1	98 HC 70 MCI 30 AD	98	75.9 ± 9.0	29.0 ± 1.2				70	76.2 ± 7.2	25.6 ± 3.5	30	78.0 ± 6.9	21.2 ± 4.0	CDR	1.5T	automatic	volume	[|(R-L)| / ((L+R)/2)] *100%	absolute	hippocampus	The volume asymmetry was significantly increase with AD severity (AD > MCI > HC)
Asymmetric Differences in the Gray Matter Volume and Functional Connections of the Amygdala Are Associated With Clinical Manifestations of Alzheimer’s Disease	Wu et al	2020	recruitment	32 HC 48 AD	32	65 ± 9.2	28.4 ± 1.5							48	66 ± 9.9	15.5 ± 4.7	NINCDS-ADRDA	3.0T	automatic	volume functional connectivity	R - L	absolute	global brain	Rightward volume asymmetry in the amygdala and the leftward volume asymmetry in the thalamus were significantly higher in the AD group than HC group The functional connectivity asymmetry between the amygdala and precuneus were significantly differe between AD and HC groups
Altered Neuroanatomical Asymmetries of Subcortical Structures in Subjective Cognitive Decline, Amnestic Mild Cognitive Impairment, and Alzheimer’s Disease	Fu et al	2021	recruitment	42 HC 35 SCD 43 amnestic MCI 41 AD	42	64.24 ± 6.16		35	64.54 ± 7.29		43	67.47 ± 10.03		41	68.88 ± 7.86		Petersen criteria NIA-AA	3.0T	automatic	volume surface area shape	[|(L-R)| / |(L+R)|]*100 [|(L-R)| / |(L+R)|]*100	absolute	12 subcortical structures	Asymmetry differences of volume, surface area and shape were found across several subcortical structures in AD pathology details see original article
Automated Midline Estimation for Symmetry Analysis of Cerebral Hemispheres in FLAIR MRI	Gibicar et al	2021	Canadian Consortium on Neurodegeneration in Aging	47 SCD 96 MCI 40 AD				47			96			40				3.0T	automatic	shape	|(L-R)| /(L+R)		hemisphere	Shape asymmetries were significant differ between SCD and MCI groups, as well as SCD - AD groups, but not between MCI-AD groups
Distinct Atrophy Pattern of Hippocampal Subfields in Patients with Progressive and Stable Mild Cognitive Impairment: A Longitudinal MRI Study	Zeng et al	2021	ADNI	102 HC 52 sMCI 29 pMCI	102	73.64 ± 6.05	29.10 ± 1.25				52 29	72.92 ± 7.38 72.56 ± 7.43	26.87 ± 1.33 26.83 ± 1.61				NINCDS-ADRDA	3.0T	automatic	volume	[|(L-R)| / (L+R)] * 100	TIV	hippocampal subfields	Stronger volume asymmetry were found in the subiculum and the molecular layer in MCI than HC group
Asymmetric thinning of the cerebral cortex across the adult lifespan is accelerated in Alzheimer’s disease	Roe et al	2021	Australian Imaging Biomarkers and Lifestyle Study of Aging	128 HC 41 AD	128	73								41	74.7			1.5T, 3.0T	automatic	thickness	L - R		cerebral cortex	Leftward thickness asymmetry changes in most frontal cortical regions and the anterior temporal cortex were accelerated in AD patients
MRI biomarkers for Alzheimer's disease: the impact of functional connectivity in the default mode network and structural connectivity between lobes on diagnostic accuracy	Mohtasib et al	2022	recruitment	20 HC 20 AD	20	62.4 ± 8.6								20	66.7 ± 11.1		NINCDS-ADRDA DSM-IV-TR	3.0T	automatic	volume	[|L - R| / (L + R)] * 200		hippocampus	Larger volume asymmetry was found in the hippocampus in AD patients compared to HC
Atrophy asymmetry in hippocampal subfields in patients with Alzheimer’s disease and mild cognitive impairment	Jahanshahi et al	2023	ADNI	20 HC 20 MCI 20 AD	20	62.4 ± 1.5	29.1 ± 0.8				20	62.5 ± 1.95	27.4 ± 2.5	20	63.2 ± 1.4	21.4 ± 2.6		3.0T	automatic	volume	[(R-L) / (L+R)]*100 丨(R-L)丨/ (L+R) *100	TIV	hippocampal subfields	No significant directional volume asymmetry differences were found among three groups Significant non-directional volume asymmetry differences were found in several hippocampal subfields between AD - HC groups and AD - MCI groups details see original article
Contribution of Brain Regions Asymmetry Scores Combined with Random Forest Classifier in the Diagnosis of Alzheimer’s Disease in His Earlier Stage	Mabrouk et al	2023	ADNI	82 HC 52 early MCI 70 late MCI 71 AD	82	74.38					52 70	77.78 77.51		71	77.57			3.0T	automatic	volume	[(R-L) / (L+R)]*100	absolute	19 regions in the brain	Stronger rightward asymmetry was found in the amygdala in patients groups (AD, EMCI, LMCI) than healthy control group
Evaluation of volumetric asymmetry of the dorsolateral prefrontal cortex and medial temporal lobe in Alzheimer’s disease using the atlas-based method	Karaca et al	2023	recruitment	25 HC 25 AD	25	62.16 ± 8.2	29.48 ± 0.5							25	69.20 ± 7.7	18.08 ± 5.7	NINCDS-ADRDA	1.5T	automatic	volume	[(L-R) / 0.5*(L+R)] * 100%	absolute	superior frontal gyrus, middle frontal gyrus and medial temporal lobe cortex	AD patients showed weaker leftward asymmetry in the dorsolateral prefrontal cortex and the superior frontal gyrus than HC
NORHA: A NORmal Hippocampal Asymmetry Deviation Index Based on One‑Class Novelty Detection and 3D Shape Features	Deangeli et al	2023	Open Access Series of Imaging Studies ADNI	770 HC 71 MCI 179 AD	717 53						71	75 ± 8		146 33	74 ± 9			1.5T, 3.0T	automatic	shape	NORHA index		hippocampus	Significant shape asymmetry differences were found between AD and HC in both datasets, as well as between AD and MCI in ADNI dataset
Altered cortical and subcortical morphometric features and asymmetries in the subjective cognitive decline and mild cognitive impairment	Yang et al	2023	recruitment	70 HC 62 SCD 97 MCI	70	64.64 ± 5.76	29.13 ± 0.74	62	64.85 ± 5.62	28.89 ± 0.85	97	65.18 ± 6.56	25.85 ± 1.03				MMSE & CDR & GDS	3.0T	automatic	volume thickness surface area shape	(L-R)*100 / (L+R)	absolute	cerebral cortex subfields of the hippocampus, hypothalamus, and thalamus	Significant differences were found in surface area asymmetry in the pars orbitalis between HC and MCI groups, and in the precuneus between SCD and MCI; Significant differences were found in cortical thickness asymmetry in the superior temporal gyrus and insula between SCD and MCI groups; no significant asymmetry differences were found in subcortical structures
Longitudinal volumetric changes in amygdala subregions in frontotemporal dementia	Huang et al	2024	FRONTIER Research Clinic database recruitment	20 AD 20 bvFTD 20 SD 20 PNFA 20 HC	20	68.2 ± 5.2								20	62.8 ± 6.9		NIA-AA	3.0T	automatic	volume	(R-L)*100/(L+R)	TIV	amygdala and its subregions	SD group exhibited a larger asymmetry than all the other groups, with a greater left to right amygdala atrophy. Volume asymmetry did not differ among bvFTD, PNFA, AD, and HC groups.
Progression of hippocampal subfield atrophy and asymmetry in Alzheimer’s disease	Xu et al	2024	ADNI	68 HC 86 MCI 53 AD	68	72.56 ± 6.01	29.06 ± 1.29				86	72.98 ± 7.14	27.63 ± 1.64	53	75.45 ± 8.11	22.79 ± 2.48	MMSE & CDR		automatic	volume	丨(L-R)丨*100 / 丨(L+R)丨		hippocampal subfields	At baseline, AD patients showed increased AI in the tail, subiculum, parasubiculum, ML, GC-MLDG, CA3, and CA4 than HC. Whereas compared to MCI, AD patients showed increased AI in the subiculum (Table 4). At 2-year follow-up, AD patients showed increased AI in the tail, subiculum, CA1, HP fissure, ML, GC-ML-DG, CA3, CA4, and fimbria than HC. And increased AI in the subiculum, HP fissure, and CA4 c…
Normative Modeling of Thalamic Nuclear Volumes and Characterization of Lateralized Volume Alterations in Alzheimer’s Disease Versus Schizophrenia	Young et al	2024	ADNI	124 HC 211 early MCI 113 late MCI 88 AD	124	73.4 ± 6.2					211 113	70.5 ± 7.1 71.8 ± 7.9		88	74.0 ± 7.8				automatic	volume	(L-R) /(L+R)		thalamic subfields	smaller volumes on the left than the right in the whole thalamus and VLp nucleus and vice versa in the MGN in early MCI individuals compared to HC
Quantifying Hippocampal Shape Asymmetry in Alzheimer’s Disease Using Optimal Shape Correspondences	Zhu et al	2024	Open Access Series of Imaging Studies - 3	717 HC 208 AD	717									208				1.5T, 3.0T	automatic	volume shape	volume asymmetry: L-R; 丨L-R丨 shape asymmetry formula please see article	TIV	hippocampus	AD showed stronger non-directional volume asymmetry in the hippocampus compare with HC Significant shape asymmetry of the hippocampus were found between AD and HC No significant directional volume asymmetry in the hippocampus were found between AD and HC
Abnormal Gyrus Rectus Asymmetry in Alzheimer’s Disease: An MRI-Based Parcellation Method	Karaca et al	2025	recruitment	25 HC 25 AD	25	62.16 ± 8.2	29.48 ± 0.5							25	69.20 ± 7.7	18.08 ± 5.7	NINCDS-ADRDA	1.5T	automatic	volume	[(L-R) / 0.5*(L+R)] * 100%	absolute	brain hemispheres, gyrus rectus (Brodmann Area 14, BA14), lateral orbitofrontal gyrus (BA11), and the medial orbitofrontal gyrus (BA12)	increased rightward volumetric asymmetry of the gyrus rectus in AD patients compared to healthy controls
Altered hemispheres lateralization of brain functional gradients in Alzheimer's disease	Liu et al	2025	ADNI	45 HC 45 MCI 45 AD	45	74.43 ± 8.24					45	75.35 ± 8.54		45	76.22 ± 8.54			3.0T		functional connectivity gradient	L -R		hemisphere and 17 networks	leftward hemispheric lateralization demonstrated progressive attenuation along the continuum from normal controls to AD; leftward hemispheric lateralization of DMN and CN were significantly differed between AD and HC, as well as between AD and MCI; leftward hemispheric lateralization was positively associated with cognitive level
The Cortical Asymmetry Index for subtyping dementia patients	Pérez-Millan et al	2025	recruitment	173 HC 230 AD	173	59.4 ± 15.0								230	65.3 ± 9.9		NIA-AA	3.0T	automatic	thickness	distribution difference (non-directional)		hemisphere	AD group showed stronger non-directional cortical thickness hemispheric asymmetry than HC
Deep learning-based hippocampus asymmetry assessment for Alzheimer’s disease diagnosis	Zhang et al	2025	ADNI1	60 HC 97 MCI 42 AD	60	75.2 ± 3.8					97	74.5 ± 8.1		42	74.2 ± 8.3				automatic	volume	deviation degree between sample and reference (non-directional)		hippocampus	AD and MCI groups both showed stronger non-directional volume asymmetry in the hippocampus than HC
Mapping Divergent Subfield-Specific Hippocampal Degeneration in Mild Cognitive Impairment Continuum: Volumetric, Cognitive, and Genetic Predictors of Accelerated Hippocampal Biological Aging	Ghaderi et al	2025	ADNI	16 HC 16 early MCI 17 late MCI	16	74.94 ± 5.13	29 ± 1				16 17	74.94 ± 5.13 72.94 ± 7.26	28 ± 2 23 ± 7					3.0T	automatic	volume	(R-L)*100/(L+R)		hippocampus and its subfields	No significant directional volume asymmetry differences were reported in early MCI and late MCI individuals with eMCI exhibited stronger rightward asymmetry in the hippocampal CA2/3 subregions than late MCI
Cortical asymmetry in autosomal dominant Alzheimer’s disease progression	Pérez-Millan et al	2025	recruitment Alzheimer network observational study	234 HC 73 MCI 317 AD (AMC+SMC)	19 215	33.7 ± 10.9 37.2 ± 11.0	29.3 ± 1.2 29.1 ± 1.3				merged with AD			22 19 234 115	37.0 ± 8.9 50.5 ± 10.0 34.2 ± 9.3 45.2 ± 9.7	29.3 ± 1.0 20.1 ± 5.6 29.1 ± 1.2 22.9 ± 6.5		3.0T	automatic	thickness	distribution difference (non-directional)		hemisphere	AD individuals with SMC showed stronger non-directional cortical thickness hemispheric asymmetry than HC and individuals with AMC Within SMC, CAI increases with disease progression, and individuals with APOE3/3 genotype exhibited greater brain asymmetry than other APOE genotypes
Abbreviations:
ADNI: Alzheimer’s Disease Neuroimaging Initiative; AIBL: Australian Imaging Biomarkers and Lifestyle Flagship Study of Ageing
HC: health control; SCD: subjective cognitive decline; MCI: mild cognitive impairment; AD: Alzheimer's disease; UA: usual aging; SA: successful aging; DLB: dementia with Lewy bodies; sMCI: MCI-stable; pMCI: MCI-progressor; FTLD: frontotemporal lobar degeneration; FTD: fronto-temporal dementia; bvFTD: behavioral variant FTD; SD: semantic dementia; VaD: vascular dementia; PNFA: primary nonfluent ap…
NINCDS-ADRDA: National Institute of Neurological and Communicative Disorders and Stroke (NINCDS) and the Alzheimer’s Disease and Related Disorders Association (ADRDA)
CSF: cerebrospinal fluid; GM: grey matter
R:right; L:left
