# Supplementary material
Source: Research Square preprint supplement (doi:10.21203/rs.3.rs-9759400/v1)
Supplement: Supplementary file 2 [file b066f8efedbc31f0d20e5354.docx]

**Table S3: Risk of bias assessment of included studies.**

|  | Selection | | | | Comparability | Exposure | | |  |
| --- | --- | --- | --- | --- | --- | --- | --- | --- | --- |
| Study | Definition of cases | Representativeness of the cases | Selection of Controls | Definition of Controls | Comparability of cases and controls | Ascertainment of exposure | Same method of ascertainment | Non-Response rate | overall |
| Ardekani et al., 2019 |  | * | * | * | * | * | * | N/A | 6/9 |
| Banks et al., 2018 | * | * | * | * | ** | * | * | N/A | 8/9 |
| Boccardi et al., 2003 |  | * | * | * | * | * | * | N/A | 6/9 |
| Cherbuin et al., 2010 | * | * | * | * | * | * | * | N/A | 7/9 |
| Deangeli et al., 2023 | * | * | * |  |  | * | * | N/A | 5/9 |
| Derflinger et al., 2011 | * | * | * |  | ** | * | * | N/A | 7/9 |
| Fennema-Notestine et al., 2009 | * | * | * | * | * | * | * | N/A | 7/9 |
| Fu et al., 2021 | * | * | * | * | ** | * | * | N/A | 8/9 |
| Ghaderi et al., 2025 | * | * | * | * | ** | * | * | N/A | 8/9 |
| Gibicar et al., 2021 | * | * | * | * | * | * | * | N/A | 7/9 |
| Heckemann et al., 2011 | * | * | * | * | ** | * | * | N/A | 8/9 |
| Huang et al., 2024 | * | * | * | * | ** | * | * | N/A | 8/9 |
| Jahanshahi et al., 2023 | * | * | * | * | * | * | * | N/A | 7/9 |
| Karaca et al., 2025 | * | * |  | * | * | * | * | N/A | 6/9 |
| Karaca et al., 2023 | * | * |  | * |  | * | * | N/A | 5/9 |
| Kim et al., 2012 |  | * | * | * | * | * | * | N/A | 6/9 |
| Krasuski et al., 1998 | * | * | * | * | * | * | * | N/A | 7/9 |
| La Joie et al., 2013 |  | * | * | * | ** | * | * | N/A | 7/9 |
| Liu et al., 2018 | * | * | * | * | ** | * | * | N/A | 8/9 |
| Liu et al., 2025 | * | * | * | * | ** | * | * | N/A | 8/9 |
| Long et al., 2018 | * | * | * | * | ** | * | * | N/A | 8/9 |
| Low, Mak, et al., 2019 | * | * | * | * | * | * | * | N/A | 7/9 |
| Low, Ng, et al., 2019 | * | * | * | * | * | * | * | N/A | 7/9 |
| Mabrouk et al., 2023 | * | * | * | * |  | * | * | N/A | 6/9 |
| Mohtasib et al., 2022 | * | * | * | * | * | * | * | N/A | 7/9 |
| Pérez-Millan et al., 2025a | * | * | * | * | * | * | * | N/A | 7/9 |
| Pérez-Millan et al., 2025b | * | * | * | * | * | * | * | N/A | 7/9 |
| Roe et al., 2021 | * | * | * | * | ** | * | * | N/A | 8/9 |
| Sarica et al., 2018 | * | * | * | * | * | * | * | N/A | 7/9 |
| Shi et al., 2009 | N/A | N/A | N/A | N/A | N/A | N/A | N/A | N/A | meta-analyses |
| Shi et al., 2007 | * |  |  |  |  | * | * | N/A | 3/9 |
| Thompson et al., 1998 | * | * | * | * | ** | * | * | N/A | 8/9 |
| Wachinger et al., 2016 | * | * | * | * |  | * | * | N/A | 6/9 |
| Wachinger et al., 2018 | * | * | * | * |  | * | * | N/A | 6/9 |
| Whitwell et al., 2005 |  | * | * | * | * | * | * | N/A | 6/9 |
| Wolf et al., 2001 |  | * | * | * | ** | * | * | N/A | 7/9 |
| Wu et al., 2020 | * | * | * | * | ** | * | * | N/A | 8/9 |
| Xu et al., 2024 | * | * | * | * | * | * | * | N/A | 7/9 |
| Xu et al., 2008 |  | * |  | * | * | * | * | N/A | 5/9 |
| Yang et al., 2017 | * | * | * | * | * | * | * | N/A | 7/9 |
| Yang et al., 2023 | * | * | * | * | ** | * | * | N/A | 8/9 |
| Young et al., 2024 | * | * | * | * | * | * | * | N/A | 7/9 |
| Yue et al., 2018 | * | * | * | * | * | * | * | N/A | 7/9 |
| Zeng et al., 2021 | * | * | * | * | ** | * | * | N/A | 8/9 |
| Zhang et al., 2025 | * | * | * | * | * | * | * | N/A | 7/9 |
| Zhu et al., 2024 | * | * | * |  |  | * | * | N/A | 5/9 |
| * equals one point. According to the Newcastle Ottawa Scale manual, maximum of two points can be given for Comparability, and one point for other items. Non-Response rate was not applicable to the present study. | | | | | | | | | |
